# Supplementary material
Source: ML conference proceedings conference paper supplement (https://openreview.net/forum?id=2DtxPCL3T5)
Supplement: supplementary_material [file attachment]

## A Example PyTorch Implementation of Gist Masking

See Listing A.1 for a sample annotated implementation of gist masking. This PyTorch implementation relies on basic NumPy-style tensor operations and can thus be adapted easily to a framework like JAX.

## B Data, Training, Evaluation, and Compute Details

Code and data are available in the supplementary material and will be made public upon paper acceptance via GitHub. Single gist token model checkpoints (positive control, gist, negative control) will also be made public via Hugging Face.

**Data.** For LLaMA-7B, we used a maximum sequence length of 512 tokens during training and evaluation, except with the Human validation split, where the maximum length was increased to 768 (the Human instructions are longer). Examples longer than this length are truncated from the end. For FLAN-T5-XXL, we set a maximum input length (task  $t$  + input  $x$ ) of 128 and a maximum output length of 256, except again for the Human split, where the maximum input and output lengths were both set to 384. For both models, we set a maximum generation length of 512 tokens. These lengths were chosen such that  $< 1\%$  of examples across the board were truncated during training and evaluation for both models.

**Training.** Full hyperparameters for training runs are located in Table A.1. These parameters were adapted from previous published work finetuning LLaMA/FLAN-T5. For LLaMA-7B, parameters are identical to those used in training Alpaca Taori et al. [31]. For FLAN-T5-XXL, parameters are identical to those used in training Tk-INSTRUCT [37], except with a  $5e-5$  learning rate, as used in the Tk-INSTRUCT GitHub repository<sup>3</sup> rather than the  $1e-5$  learning rate in the paper.

LLaMA-7B was trained for 3000 steps, while FLAN-T5-XXL was trained for 16000 steps. Since there are about 130k examples in Alpaca+, given the batch sizes in Table A.1 this corresponds to about  $\sim 3$  epochs and  $\sim 2$  epochs of training, respectively. These numbers, again, are identical to Taori et al. [31] and Wang et al. [36]. We note that the training time is relatively flexible; for example, we did not see substantial gains training beyond 1 epoch for FLAN-T5-XXL.

**Evaluation.** During evaluation and benchmarking, we simply greedily decoded the most likely sequence. We saw limited gains from beam search with beam size  $B = 4$ .

**Compute.** Experiments were run on a cluster machine with 4xA100-SXM4-80GB NVIDIA GPUs, 480GB RAM, and 16 CPUs, using PyTorch 2.0 [24], Hugging Face Transformers [41], and DeepSpeed [29]. Training runs take about  $\sim 7$  hours to complete for LLaMA-7B and  $\sim 25$  hours for FLAN-T5-XXL. Benchmarking results were obtained on the same machine, but using just 1 of the A100 GPUs.

## C Details of ChatGPT Evaluation

We used the ChatGPT API, specifically the chatgpt-3.5-turbo engine, to run our ChatGPT evaluation experiments over a period of 2 weeks between March 27 and April 7, 2023.

The full prompt given to ChatGPT is located in Listing A.2, and contains 4 examples of desired output from ChatGPT, including preferring factually accurate responses (Example 1), preferring responses that follow the instruction, even if imperfect (Examples 2 and 3), and examples of models being equally wrong (Examples 4). For the two models under comparison, we randomized the order of presentation of each model as either Assistant A or Assistant B, to avoid order effects.

ChatGPT was instructed to only respond in JSON format, outputting first a reason key followed by a choice key, to encourage chain-of-thought reasoning [39]. On rare occasions ( $< 0.25\%$  of the time), ChatGPT would output a response that did not conform to the requested JSON format (e.g. it would

<sup>3</sup>[https://github.com/yizhongw/Tk-Instruct/blob/1ab6fad/scripts/train\\_tk\\_instruct.sh](https://github.com/yizhongw/Tk-Instruct/blob/1ab6fad/scripts/train_tk_instruct.sh)

```

1 import torch
2
3
4 def reverse_cumsum(x: torch.Tensor) -> torch.Tensor:
5     """Cumulative sum from right to left.
6
7     See https://github.com/pytorch/pytorch/issues/33520.
8     """
9     return x + torch.sum(x, dim=-1, keepdims=True) - torch.cumsum(x, dim=-1)
10
11
12 def make_mask_pre_first_gist(inputs: torch.Tensor, gist_token: int, dtype=torch.int64) -> torch.Tensor:
13     """Returns a mask where all tokens prior to the first gist token are masked out.
14
15     Args:
16         inputs: a Tensor of input tokens where the last dimension is the sequence length.
17         gist_token: the integer id of the gist token.
18         dtype: the dtype of the mask, default int64.
19     Returns:
20         The requested mask.
21     """
22     return ((inputs == gist_token).cumsum(-1) >= 1).type(dtype)
23
24
25 def make_mask_post_last_gist(inputs: torch.Tensor, gist_token: int, dtype=torch.int64) -> torch.Tensor:
26     """Returns a mask where all tokens after the last gist token are masked out.
27
28     Computes the same as mask_pre_first_gist_token, but reverses the sequence before and after the cumsum.
29
30     Args:
31         inputs: a Tensor of input tokens where the last dimension is the sequence length.
32         gist_token: the integer id of the gist token.
33         dtype: the dtype of the mask, default int64.
34     Returns:
35         The requested mask.
36     """
37     return (reverse_cumsum(inputs == gist_token) >= 1).type(dtype)
38
39
40 def make_gist_mask(inputs: torch.Tensor, gist_token: int, pad_token: int, dtype=torch.int64) -> torch.Tensor:
41     """Creates a gist mask from supplied inputs and gist/pad tokens.
42
43     Tokens after the last gist cannot attend to tokens prior to the first gist. Additionally, tokens *before*
44     the last gist cannot attend to tokens *after* the last gist.
45
46     The gist mask is broadcasted to 4D (with a singleton dim 1) for compatibility with multi-headed attention
47     (where dim 1 is the head dimension).
48
49     Args:
50         inputs: a Tensor of shape (batch_size, seq_len) input tokens.
51         gist_token: the integer id of the gist token.
52         pad_token: the integer id of the pad token. inputs == pad_token are masked out.
53         dtype: the dtype of the mask, default int64.
54     Returns:
55         The requested mask of shape (batch_size, 1, seq_len, seq_len)
56     """
57     # Attention mask for tokens before the last gist token.
58     pre_gist_mask = make_mask_post_last_gist(inputs, gist_token, dtype=torch.bool)[: , None, None]
59     # Attention mask for tokens after the last gist token.
60     post_gist_mask = make_mask_pre_first_gist(inputs, gist_token, dtype=torch.bool)[: , None, None]
61     # Construct time masks by permuting to time dimension.
62     pre_gist_time_mask = pre_gist_mask.permute((0, 1, 3, 2))
63
64     mask = torch.where(pre_gist_time_mask, pre_gist_mask, post_gist_mask)
65     mask = mask & (inputs != pad_token)[: , None, None] # Mask out pad tokens.
66
67     return mask.type(dtype)

```

Listing A.1: Sample PyTorch implementation of gist masking.

Table A.1: Hyperparameters for training runs.

|                    | LLaMA-7B    | FLAN-T5-XXL |
|--------------------|-------------|-------------|
| num steps          | 3000        | 16000       |
| num train epochs   | $\approx 3$ | $\approx 2$ |
| batch size         | 128         | 16          |
| learning rate      | 2e-5        | 5e-5        |
| warmup ratio       | 0.03        | 0           |
| precision          | bf16        | bf16        |
| optimizer          | AdamW       | AdamW       |
| <b>Deepspeed</b>   |             |             |
| # GPUs (A100 80GB) | 4           | 4           |
| ZeRO stage         | 3           | 3           |
| subgroup size      | 1e9         | 1e9         |
| max live params    | 1e9         | 1e9         |
| max reuse distance | 1e9         | 1e9         |

Table A.2: Pairwise Cohen’s  $\kappa$  between human annotators (H1, H2, H3) and ChatGPT.

| (a) LLaMA-7B |     |     |     |         | (b) FLAN-T5-XXL |     |     |     |         |
|--------------|-----|-----|-----|---------|-----------------|-----|-----|-----|---------|
|              | H1  | H2  | H3  | Average |                 | H1  | H2  | H3  | Average |
| H1           | –   | .21 | .33 | .27     | H1              | –   | .33 | .34 | .34     |
| H2           | .21 | –   | .19 | .20     | H2              | .33 | –   | .33 | .33     |
| H3           | .33 | .19 | –   | .26     | H3              | .34 | .33 | –   | .33     |
| ChatGPT      | .38 | .22 | .26 | .29     | ChatGPT         | .35 | .18 | .34 | .29     |

just give an unstructured paragraph). In these cases we manually went through and converted these responses to JSON, without altering ChatGPT’s reasoning.

In total, we collected ~22.5k judgments from ChatGPT for an estimated cost of \$29.28. The full outputs for each model across the Alpaca+ validation splits, as well as ChatGPT’s responses and choices, are available in the code link above.

## D Additional Human Evaluation Details and Results

### D.1 Experimental Details

For each of the 100 examples randomly selected from the Human validation split, we recruited 3 US or UK-based, English-fluent annotators from Prolific, an online crowdsourcing platform. Experiments were IRB approved under a generic human experiments IRB given to the authors.

The annotation interface given to Prolific crowdworkers is located in Figure A.1. To verify task comprehension, participants were shown two simple examples before the main body of the task (Figure A.2), and were required to answer correctly before proceeding. We compensated participants USD \$14.35/hour for an estimated cost (including Prolific fees) of USD \$141.64.

### D.2 Additional Results

See Table A.2 for a breakdown of Cohen’s  $\kappa$  between human annotators and ChatGPT. We used a weighted version of Cohen’s  $\kappa$  with linear weights, since the response scale is ordinal (e.g. “tie” is a closer judgment to “pos control win” than “gist win”).

## E Exact Match Results

See Figure A.3 for a plot of exact match rates for the gist and positive control models (as measured by exact string match).

Given a user instruction and two AI assistant responses, your job is to select the response that is more helpful, and give reasons why. Judge responses holistically, paying special attention to whether the response (1) correctly follows the provided instruction and (2) is factually accurate. If both responses are equal, you may call a tie, but please use this response sparingly.

Example 1:

Instruction: Given the name of a city, tell me the name of the state it is in.

Input: Los Angeles

Assistant A: California

Assistant B: Wyoming

Your output should be:

```
{"reason": "Los Angeles is in California. Only Assistant A is correct.", "choice": "A"}
```

Example 2:

Instruction: Give me some examples of fun things to do with the kids on a weekend.

Assistant A: For example, what should I do with my kids on a weekend? What if I'm in a city? What if I'm on the beach?

Assistant B: You could try going to the zoo or a museum. If you want to stay at home, you could play board games or bake cookies.

Your output should be:

```
{"reason": "Assistant A doesn't seem to be following the instruction. Assistant B provides helpful information with examples.", "choice": "B"}
```

Example 3:

Instruction: Write me a python function that prints "Hello, World".

Assistant A: `def hello_world(): print("Hello!")`

Assistant B: "Hello, World"

Your output should be:

```
{"reason": "Assistant B just wrote 'Hello, World'. Assistant A actually wrote a Python function, even if it doesn't exactly print the right thing, so overall Assistant A is better.", "choice": "A"}
```

Example 4:

Instruction: Translate the following sentence from English to French.

Input: I like cats.

Assistant A: Me gustan los gatos.

Assistant B: 我喜欢猫.

Your output should be:

```
{"reason": "Both assistants got the language wrong.", "choice": "tie"}
```

Your response should only be in the JSON format above; THERE SHOULD BE NO OTHER CONTENT INCLUDED IN YOUR RESPONSE. Write the "reason" key before writing the "choice" key, so that you think step-by-step before making your decision. KEEP YOUR REASONING BRIEF.

**Listing A.2: Full prompt given to ChatGPT for evaluation.** This prompt populates the system field in the ChatGPT API; the actual example to be evaluated is formatted like the examples in the prompt above, then given as the sole input in the user field.

## 526 F Additional FLOPs details

527 The FLOPs required for a Transformer forward pass with varying KV cache lengths can be estimated  
528 by modifying existing equations to account for self-attention back to the KV cache. As an example,  
529 we modify the FLOPs equations used for computing FLOPs in the Chinchilla paper (Appendix F in

# Judging AI Assistants

Progress: 12/50

**User Instruction:** Write a good Twitter Bio. Try to cover all the provided main points in your generated bio.

**User Input:** Name: Jane Main points: - Architect - Interested in Tech Written in first person Use casual tone

**Assistant A:** Jane is an architect who is interested in tech. She loves to solve problems and create beautiful things.

**Assistant B:** I'm Jane, an architect who loves to explore the latest tech trends. I'm always looking for new ways to make our lives easier and more convenient. Follow me for the latest tech news, tips, and inspiration!

Which Assistant is more helpful?

A

B

TIE

I DON'T KNOW

## Remember:

When making your judgment, please consider whether the response

1. attempts to follow the provided instruction, and
2. is factually accurate.

**If you can't decide**, e.g. because the responses are the same or equally good or bad, you may call a tie, but please use this response sparingly.

**Finally**, if you do not understand the question being asked: you may still be able to make an educated guess about which Assistant is better, for example if one assistant is clearly not following the directions. If so, please do! Otherwise, click the "I don't know" button. There is no need to look up additional information or spend a huge amount of time on an example; just click "I don't know."

Figure A.1: Annotation interface given to Prolific crowdworkers.

**User Instruction:** Give me some examples of fun things to do with the kids on a weekend.

**Assistant A:** For example, what should I do with my kids on a weekend? What if I'm in a city? What if I'm on the beach?

**Assistant B:** You could try going to the zoo or a museum. If you want to stay at home, you could play board games or paint photographs.

**User Instruction:** Find me a synonym of the following word.

**User Input:** speedy

**Assistant A:** quick

**Assistant B:** lazy

Figure A.2: Example items given to humans before the start of the task.

530 [\[14\]](#)). Let  $\text{seq\_len\_with\_past} = \text{seq\_len} + \text{kv\_cache\_len}$ . Then the modified Transformer FLOPs  
531 equations are:

#### 532 Embeddings

533 •  $2 \times \text{seq\_len} \times \text{vocab\_size} \times \text{d\_model}$

#### 534 Attention (Single Layer)

- 535 • *Key, query, and value projections:*  $2 \times 3 \times \text{seq\_len} \times \text{d\_model} \times (\text{key\_size} \times \text{num\_heads})$   
536 • *Key and query logits:*  $2 \times \text{seq\_len} \times \text{seq\_len\_with\_past} \times (\text{key\_size} \times \text{num\_heads})$   
537 • *Softmax:*  $3 \times \text{num\_heads} \times \text{seq\_len} \times \text{seq\_len\_with\_past}$   
538 • *Softmax @ query reductions:*  $2 \times \text{seq\_len} \times \text{seq\_len\_with\_past} \times (\text{key\_size} \times \text{num\_heads})$   
539 • *Final linear:*  $2 \times \text{seq\_len} \times (\text{key\_size} \times \text{num\_heads}) \times \text{d\_model}$

#### 540 Dense Block

541 •  $2 \times \text{seq\_len} \times (\text{d\_model} \times \text{ffw\_size} + \text{d\_model} \times \text{ffw\_size})$

#### 542 Final Logits

543 •  $2 \times \text{seq\_len} \times \text{d\_model} \times \text{vocab\_size}$

#### 544 Total Forward Pass FLOPs

545 •  $\text{embeddings} + \text{num\_layers} \times (\text{attention\_single\_layer} + \text{dense\_block}) + \text{final\_logits}$

546 It can be seen that only 3 operations in each attention layer depend on the KV cache size, and  
547 they take up a relatively insignificant amount of FLOPs. As an illustrative example, Figure [A.4](#)  
548 shows the relative FLOPs contributions within a single layer of attention for LLaMA-7B, assuming a  
549 2000-length KV cache and a single input token. Operations dependent on the KV cache constitute at  
550 most ~10% of the total attention layer FLOPs; the rest are used in KQV projections and dense layers  
551 for processing the single new input token.

552 Given a KV cache compression rate of 26, as observed in our Human validation split, the Chinchilla  
553 equations predict a relative improvement of Gist caching of 0.12%. This is extremely close to the  
554 0.11% improvement actually observed in Table [3](#). These results show that optimizing the KV cache  
555 size does not actually lead to huge compute speedups during Transformer inference, at least for  
556 relatively small prompt lengths. Nevertheless, there are clear memory and storage benefits to be  
557 gained from prompt compression, as discussed in Section [6](#).

## 558 G Additional Examples of Model Outputs

559 See Listing [A.3](#) for additional examples of instructions, inputs, model completions (for LLaMA-7B  
560 and FLAN-T5-XXL across Pos, Gist, TF-IDF, and Neg conditions), human judgments, and ChatGPT  
561 judgments (+reasons). Examples are not cherry-picked; we enumerate the first 10 examples of the  
562 Alpaca+ Human validation split.

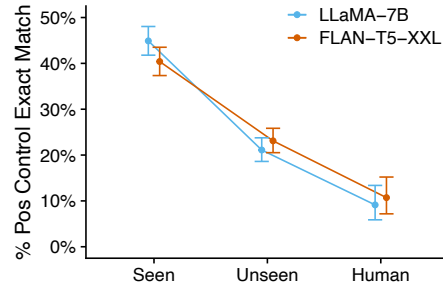

Figure A.3: **Exact match rates.** Rate at which the 1 token gist models give the same output as the positive control (exact string match). Error bars are 95% exact binomial confidence intervals.

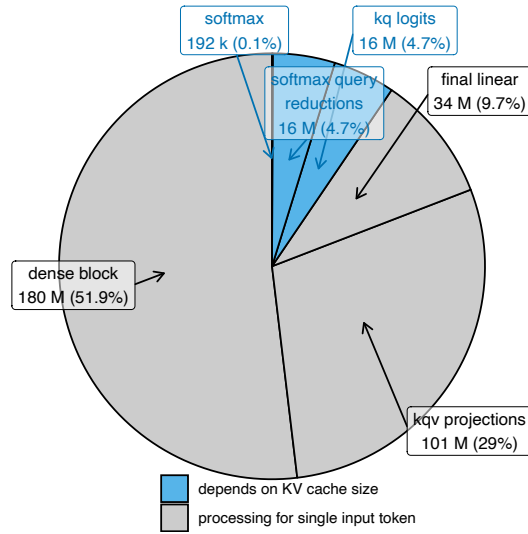

Figure A.4: **FLOPs for each operation involved in a single layer of self attention with a 2000-length KV cache**, according to the Chinchilla estimates for LLaMA-7B. At most 9.6% of FLOPs can be optimized away by reducing the size of the KV cache.

563 **Example 1**  
564 **Instruction:** Write a good Twitter Bio. Try to cover all the provided main points in your generated bio. <G1>  
565 **Input:** Name: Jane  
566 Main points:  
567 - Architect  
568 - Interested in Tech  
569 Written in first person  
570 Use casual tone  
571 **Reference Output:** I like to think of myself as a kind of architect.  
572 I'm interested in the tech side of things, and I love coming up with new ideas for how to make things better.  
573 **TF-IDF Word:** bio  
574

575 **LLaMA-7B**  
576 **Pos:** I'm Jane, an architect and tech enthusiast.  
577 I'm interested in the latest trends and always looking to learn more.  
578 I'm here to share my thoughts and experiences with the world.  
579 **Gist:** I'm Jane, an architect and tech enthusiast.  
580 I love to explore new places and learn about different cultures.  
581 I'm always looking for fun things to do and new experiences.  
582 I'm an avid reader and enjoy learning about the world around me.  
583 I'm also a big fan of tech and love to stay up to date on the latest trends.  
584 I'm looking forward to seeing what the world has to offer!  
585 **TF-IDF:** Jane is an architect who is interested in technology.  
586 She likes to stay up to date on the latest trends and is always looking for new ways to apply them in her work.  
587 Jane is a creative problem solver who approaches each project with an innovative eye.  
588 **Neg:** Jane is an architect who is interested in technology.  
589 She likes to stay up to date on the latest trends and is always looking for new ways to incorporate them into her work.  
590 She's an avid reader of tech news and loves to explore the latest gadgets.  
591 Jane is also a big fan of the arts and enjoys visiting museums and galleries when she gets the chance.  
592 **Human choice (Pos vs Gist):** Pos Tie Gist  
593 **ChatGPT choice (Pos vs Gist):** Pos  
594 **ChatGPT reason (Pos vs Gist):** Assistant A covers all the main points provided in the instruction, while Assistant B goes off-topic  
595 and doesn't mention the interest in tech as much. Assistant A also has a more professional tone, which is more appropriate  
596 for a Twitter bio. (Assistant A: Pos, Assistant B: Gist)  
597

598 **FLAN-T5-XXL**  
599 **Pos:** I'm Jane, an architect who loves to explore the latest tech trends.  
600 I'm always looking for new ways to make our lives easier and more convenient.  
601 Follow me for the latest tech news, tips, and inspiration!  
602 **Gist:** Jane is an architect who is interested in tech.  
603 She loves to solve problems and create beautiful things.  
604 **TF-IDF:** Architect, Tech enthusiast  
605 **Neg:** Jane is an architect who is interested in tech.  
606 **Human choice (Pos vs Gist):** Pos Pos Pos  
607 **ChatGPT choice (Pos vs Gist):** Pos  
608 **ChatGPT reason (Pos vs Gist):** Assistant A covers all the main points and uses a casual tone. Assistant B is too brief and doesn't  
609 provide any specific information about Jane's interests or personality. (Assistant A: Pos, Assistant B: Gist)  
610  
611

612 **Example 2**  
613 **Instruction:** Name the top cities in France that should not be missed. Include the best aspects of each place as well. <G1>  
614 **Reference Output:** 1- Paris, Best for: Historic sights and romantic vibes  
615 2- Nice, Best for: Architecture and dining  
616 3- Lyon, Best for: Dining and live music  
617 4- Bordeaux, Best for: Wine and antiques  
618 5- Marseille, Best for: Museums and nightlife  
619 6- Strasbourg, Best for: Historic architecture and dining  
620 **TF-IDF Word:** missed  
621

622 **LLaMA-7B**  
623 **Pos:** The top cities in France that should not be missed include Paris, which is known for its iconic architecture and bustling  
624 nightlife, and Nice, which is a beautiful city on the Mediterranean known for its colorful culture and delicious cuisine.  
625 **Gist:** The top cities in France that should not be missed are Paris, Nice, Lyon, Toulouse, Marseille, and Cannes.  
626 The must-see attractions in each city include the Eiffel Tower in Paris, the Promenade des Anglais in Nice, the Old Town in Lyon,  
627 the Canal du Midi in Toulouse, the Port of Marseille in Marseille, and the Croisette in Cannes.  
628 **TF-IDF:** I missed you.  
629 **Neg:** The most popular social media platform in Europe is the Android-based Ovi from Nokia.  
630 **Human choice (Pos vs Gist):** Pos Tie Gist  
631 **ChatGPT choice (Pos vs Gist):** Gist  
632 **ChatGPT reason (Pos vs Gist):** Assistant A provides a more comprehensive list of top cities in France and includes the best aspects  
633 of each place. Assistant B only mentions two cities and their general characteristics without providing specific attractions  
634 or details. (Assistant A: Gist, Assistant B: Pos)  
635

636 **FLAN-T5-XXL**  
637 **Pos:** The top cities in France that should not be missed include Paris, Marseille, Lyon, Toulouse, Nice, and Monaco.  
638 Paris is the capital of France and is home to the Eiffel Tower, Notre-Dame de Paris, and the Louvre Museum.  
639 Marseille is a beautiful city with a vibrant nightlife, and Lyon is a great place to visit for its food and wine.  
640 Toulouse is a charming city with a vibrant nightlife, and Monaco is a beautiful place to visit for its casinos and luxurious hotels.  
641 **Gist:** Paris is one of the most beautiful cities in France.  
642 It is a great place to visit for its architecture, culture, and history.  
643 The city is also known for its beautiful gardens and parks, as well as its many museums and art galleries.  
644 The Eiffel Tower is one of the most iconic landmarks in the world, and it is a must-see for anyone visiting Paris.  
645 The Louvre is another must-see for anyone visiting Paris.  
646 It is a stunning museum that houses some of the most iconic art pieces in the world.  
647 The Notre-Dame de Paris is another must-see for anyone visiting Paris.  
648 **TF-IDF:** I would be very disappointed.  
649 **Neg:** - The Shawshank Redemption - Forrest Gump - The Godfather - Pulp Fiction - The Dark Knight  
650 **Human choice (Pos vs Gist):** Pos Pos Pos  
651 **ChatGPT choice (Pos vs Gist):** Gist



652 ChatGPT reason (Pos vs Gist): Assistant A only mentions Paris and provides more detailed information about the city, while Assistant  
653 B mentions several cities but doesn't provide much detail about any of them. Therefore, Assistant A is more helpful. (  
654 Assistant A: **Gist**, Assistant B: **Pos**)  
655  
656

### 657 Example 3

658 Instruction: Give the news title a category. Pick a category from the list of News & Buzz, Travel, Style, Arts & Culture, Politics,  
659 Tech, and Science & Health. <G1>

660 Input: The #Banksy Exhibit in Cambridge, MA is absolutely terrific.

661 Reference Output: Arts & Culture

662 TF-IDF Word: bu  
663

#### 664 LLaMA-7B

665 Pos: Arts & Culture

666 Gist: Arts & Culture

667 TF-IDF: No such bias detected.

668 Neg: The Banksy Exhibit in Cambridge, MA is absolutely fantastic.

669 Human choice (Pos vs Gist): Tie Tie Tie

670 ChatGPT choice (Pos vs Gist): Tie

671 ChatGPT reason (Pos vs Gist): Both assistants correctly identified the news title as related to Arts & Culture. (Assistant A: **Gist**,  
672 Assistant B: **Pos**)  
673

#### 674 FLAN-T5-XXL

675 Pos: Arts & Culture

676 Gist: Culture

677 TF-IDF: The Banksy Exhibit in Cambridge, MA is absolutely remarkable.

678 Neg: The #Banksy Exhibit in Cambridge, MA is remarkable.

679 Human choice (Pos vs Gist): Pos Pos Pos

680 ChatGPT choice (Pos vs Gist): Pos

681 ChatGPT reason (Pos vs Gist): The news title is about an art exhibit, so Assistant B's response of 'Arts & Culture' is more accurate  
682 and specific than Assistant A's 'Culture'. (Assistant A: **Gist**, Assistant B: **Pos**)  
683  
684

### 685 Example 4

686 Instruction: You will be tested on your knowledge of classic witticisms and aphorisms by completing the given aphorism. Write the  
687 original quote as the answer. <G1>

688 Input: two things are infinite

689 Reference Output: The universe and human stupidity; and I'm not sure about the universe.

690 (attributed to Albert Einstein)

691 TF-IDF Word: a  
692

#### 693 LLaMA-7B

694 Pos: The number of integers and the number of witticisms.

695 Gist: "Two things are infinite, the universe and human stupidity."

696 - Albert Einstein

697 TF-IDF: The number of integers and the number of real numbers.

698 Neg: Two things are infinite: the number of integers and the number of primes.

699 Human choice (Pos vs Gist): Gist Gist Gist

700 ChatGPT choice (Pos vs Gist): Gist

701 ChatGPT reason (Pos vs Gist): Assistant A correctly completes the quote with the original author, while Assistant B's response is  
702 not factually accurate. (Assistant A: **Gist**, Assistant B: **Pos**)  
703

#### 704 FLAN-T5-XXL

705 Pos: "Time and space are infinite."

706 Gist: "Actions and consequences are infinite."

707 TF-IDF: The first sentence is a statement, while the second one is an opinion.

708 Neg: The two things that are infinite are time and space.

709 Human choice (Pos vs Gist): Pos Pos Pos

710 ChatGPT choice (Pos vs Gist): Tie

711 ChatGPT reason (Pos vs Gist): Both assistants did not provide the correct completion of the given aphorism. The original quote is '  
712 Two things are infinite: the universe and human stupidity; and I'm not sure about the universe.' Therefore, neither assistant  
713 is helpful. (Assistant A: **Gist**, Assistant B: **Pos**)  
714  
715

### 716 Example 5

717 Instruction: Write the HTML syntax for the required action. <G1>

718 Input: adding an image to the page

719 Reference Output: 

720 TF-IDF Word: syntax  
721

#### 722 LLaMA-7B

723 Pos: 

724 Gist: <nooutput>

725 TF-IDF: 

726 Neg: 

727 Human choice (Pos vs Gist): Pos IDK Pos

728 ChatGPT choice (Pos vs Gist): Pos

729 ChatGPT reason (Pos vs Gist): Assistant A provides the correct HTML syntax for adding an image to the page, while Assistant B doesn'  
730 t provide any output. (Assistant A: **Pos**, Assistant B: **Gist**)  
731

#### 732 FLAN-T5-XXL

733 Pos: 

734 Gist: 

735 TF-IDF: 

736 Neg: Adding an image to the page.

737 Human choice (Pos vs Gist): Tie Gist Tie

738 ChatGPT choice (Pos vs Gist): Tie

739 ChatGPT reason (Pos vs Gist): Both assistants provided the correct HTML syntax for adding an image to the page. (Assistant A: **Pos**,  
740 Assistant B: **Gist**)

741  
742

## Example 6

743 **Instruction:** Write a to-do list based on the given information. <G1>

744 **Input:** Daily tasks in the pharmacy

745 **Reference Output:** - Police sidewalk and entrance for litter

746 - Assess window displays to make sure they are not outdated or faded

747 - Clean all doors and remove outdated and unnecessary signs

748 - Fill bags at each checkout area

749 - Clean and straighten checkout counters

750 - Tidy up seating/waiting area

751 - Face (pull product forward) in all departments

752 - Check one department a day for short and outdated product

753 - Empty all trash receptacles

754 - Vacuum (when the store is closed or only if customer traffic allows for it during store hours)

755 **TF-IDF Word:** information

756

## LLaMA-7B

757 **Pos:** - Check inventory of medications

758 - Reorder medications

759 - Prepare patient profiles

760 - Enter patient information into the computer system

761 - Verify patient information

762 - Monitor expiration dates of medications

763 - Clean and restock shelves

764 - Answer telephone and provide assistance as needed

765 - Process prescriptions

766 - Refill prescriptions

767 - Monitor inventory of supplies

768 - Stock shelves

769 - Clean and restock shelves

770 - Answer telephone and provide assistance as needed

771 **Gist:** - Check inventory and order new supplies

772 - Refill prescriptions

773 - Answer customer questions

774 - Process insurance paperwork

775 - Clean the pharmacy

776 - Stock shelves

777 - Count pills

778 - Take customer phone calls

779 - Monitor expiration dates on medications

780 - Update patient profiles

781 - Perform administrative tasks

782 - Review patient charts

783 - Contact doctors about prescriptions

784 - Answer questions from customers

785 - Process payments

786 - Maintain inventory

787 - Monitor controlled substances

788 - Perform quality control tests

789 - Review patient profiles

790 - Contact doctors about prescriptions

791 - Answer questions from customers

792 - Process payments

793 - Maintain inventory

794 - Monitor expiration dates on medications

795 - Update patient profiles

796 - Perform administrative tasks

797 - Review patient charts

798 - Contact doctors about prescriptions

799 - Answer questions from customers

800 - Process payments

801 - Maintain inventory

802 - Monitor expiration dates on medications

803 - Update patient profiles

804 - Perform administrative tasks

805 - Review patient charts

806 - Contact doctors about prescriptions

807 - Answer questions from customers

808 - Process payments

809 - Maintain inventory

810 - Monitor expiration dates on medications

811 - Update patient profiles

812 - Perform administrative tasks

813 - Review patient charts

814 - Contact doctors about prescriptions

815 - Answer questions from customers

816 - Process payments

817 - Maintain inventory

818 - Monitor expiration dates on medications

819 - Update patient profiles

820 - Perform administrative tasks

821 - Review patient charts

822 - Contact doctors about prescriptions

823 - Answer questions from customers

824 - Process payments

825 - Maintain inventory

826 - Monitor expiration dates

827 **TF-IDF:** 1.

828

832 Checking expiry dates of medications  
833 2.  
834 Re-stocking shelves  
835 3.  
836 Entering prescription information into the computer system  
837 4.  
838 Answering customer questions  
839 5.  
840 Preparing and labeling prescriptions  
841 6.  
842 Scanning barcodes to check for potential drug interactions  
843 7.  
844 Processing insurance claims  
845 8.  
846 Maintaining inventory levels of medications  
847 9.  
848 Cleaning and organizing the pharmacy  
849 10.  
850 Updating patient profiles with new information  
851 **Neg:** The pharmacist's daily tasks include checking and filling prescriptions, maintaining inventory, and counseling patients on the  
852 proper use of medications.  
853 **Human choice (Pos vs Gist):** Pos Tie Gist  
854 **ChatGPT choice (Pos vs Gist):** Pos  
855 **ChatGPT reason (Pos vs Gist):** Assistant A provides a concise and comprehensive list of daily tasks in the pharmacy, while Assistant  
856 B's list is repetitive and includes irrelevant tasks like counting pills and performing quality control tests. Assistant A is  
857 more helpful. (Assistant A: Pos, Assistant B: Gist)  
858

**FLAN-T5-XXL**  
859 **Pos:** - Check inventory - Fill prescriptions - Prepare medication - Label and package medications - Check expiration dates - Ensure  
860 all medications are in stock - Check for any errors in the inventory - Check for any problems with the medication - Check for  
861 any problems with the packaging - Check for any problems with the labeling - Check for any problems with the expiration date  
862 - Check for any problems with the packaging - Check for any problems with the labeling - Check for any problems with the  
863 packaging - Check for any problems with the packaging - Check for any problems with the  
864 **Gist:** To-do list for pharmacy: 1.  
865 Check inventory and stock shelves 2.  
866 Prepare prescriptions 3.  
867 Check inventory and stock shelves 4.  
868 Check inventory and stock shelves 5.  
869 Check inventory and stock shelves 6.  
870 Check inventory and stock shelves 7.  
871 Check inventory and stock shelves 8.  
872 Check inventory and stock shelves 9.  
873 Check inventory and stock shelves 10.  
874 Check inventory and stock shelves  
875 **TF-IDF:** 1.  
876 Stocking shelves 2.  
877 Filing paperwork 3.  
878 Greeting customers 4.  
879 Taking orders 5.  
880 Performing administrative tasks  
881 **Neg:** The daily tasks in the pharmacy include preparing medications, filling prescriptions, assisting customers, and maintaining  
882 inventory.  
883 **Human choice (Pos vs Gist):** Gist Pos Gist  
884 **ChatGPT choice (Pos vs Gist):** Pos  
885 **ChatGPT reason (Pos vs Gist):** Assistant A provides a comprehensive list of daily tasks in the pharmacy, including preparing and  
886 labeling medications, checking for errors and problems, and ensuring all medications are in stock. Assistant B only lists two  
887 tasks and repeats one of them multiple times. Assistant A is more helpful. (Assistant A: Pos, Assistant B: Gist)  
888  
889  
890

**Example 7**  
891 **Instruction:** You are given a paper citation, convert it to the requested citation style. <G1>  
892 **Input:** Chicago: Vaswani, Ashish, Shazeer, Noam, Parmar, Niki, Uszkoreit, Jakob, Jones, Llion, Gomez, Aidan N., Kaiser, Lukasz, and  
893 Illia Polosukhin. "Attention Is All You Need." arXiv, (2017). <https://doi.org/10.48550/arXiv.1706.03762>.  
894 **MLA:**  
895 **Reference Output:** Vaswani, Ashish, et al.  
896 "Attention Is All You Need."  
897 arXiv, 2017, <https://doi.org/10.48550/arXiv.1706.03762>.  
898 **TF-IDF Word:** c  
899  
900

**LLaMA-7B**  
901 **Pos:** Vaswani, Ashish, Shazeer, Noam, Parmar, Niki, Uszkoreit, Jakob, Jones, Llion, Gomez, Aidan N., Kaiser, Lukasz, and Illia  
902 Polosukhin.  
903 "Attention Is All You Need."  
904 arXiv (2017).  
905 <https://doi.org/10.48550/arXiv.1706.03762>.  
906 **Gist:** Vaswani, Ashish, Shazeer, Noam, Parmar, Niki, Uszkoreit, Jakob, Jones, Llion, Gomez, Aidan N., Kaiser, Lukasz, and Illia  
907 Polosukhin.  
908 "Attention Is All You Need."  
909 arXiv, (2017).  
910 <https://doi.org/10.48550/arXiv.1706.03762>.  
911 **TF-IDF:** Attention Is All You Need.  
912 arXiv.  
913 2017. <https://doi.org/10.48550/arXiv.1706.03762>.  
914 **Neg:** Chicago: Vaswani, Ashish, Shazeer, Noam, Parmar, Niki, Uszkoreit, Jakob, Jones, Llion, Gomez, Aidan N., Kaiser, Lukasz, and  
915 Illia Polosukhin.  
916 "Attention Is All You Need."  
917 arXiv, (2017).  
918 <https://doi.org/10.48550/arXiv.1706.03762>.  
919 **Human choice (Pos vs Gist):** IDK Tie Tie  
920 **ChatGPT choice (Pos vs Gist):** Gist

922 **ChatGPT reason (Pos vs Gist):** Both assistants provide correct MLA citation style, but Assistant A includes a comma after 'arXiv'  
 923 which is not necessary in MLA style. (Assistant A: **Gist**, Assistant B: **Pos**)  
 924  
 925 **FLAN-T5-XXL**  
 926 **Pos:** Vaswani, Ashish, Shazeer, Noam, Parmar, Niki, Uszkoreit, Jakob, Jones, Llion, Gomez, Aidan N., Kaiser, Lukasz, and Illia  
 927 Polosukhin.  
 928 "Attention Is All You Need."  
 929 arXiv, (2017).  
 930 **Gist:** Chicago: Vaswani, Ashish, Shazeer, Noam, Parmar, Niki, Uszkoreit, Jakob, Jones, Llion, Gomez, Aidan N., Kaiser, Lukasz, and  
 931 Illia Polosukhin.  
 932 "Attention Is All You Need."  
 933 arXiv, (2017).  
 934 <https://doi.org/10.48550/arXiv.1706.03762>.  
 935 **TF-IDF:** Attention is all you need.  
 936 **Neg:** Attention Is All You Need  
 937 **Human choice (Pos vs Gist):** **IDK IDK IDK**  
 938 **ChatGPT choice (Pos vs Gist):** **Gist**  
 939 **ChatGPT reason (Pos vs Gist):** The instruction asks for MLA citation style, but neither assistant provided the citation in MLA format.  
 940 However, Assistant A provided more information such as the DOI, so Assistant A is slightly more helpful. (Assistant A: **Gist**,  
 941 Assistant B: **Pos**)  
 942  
 943

## Example 8

944 **Instruction:** Provide a pleasant compliment based on the quality you have been given. <G>  
 945 Input: Truthfulness  
 946 **Reference Output:** Everything would be better if more people were like you.  
 947 **TF-IDF Word:** pleasant  
 948  
 949

### LLaMA-7B

950 **Pos:** You are remarkably truthful and honest.  
 951 **Gist:** You have a gift for being truthful.  
 952 **TF-IDF:** Truthfulness is a pleasant trait because it leads to trust, which is essential for any healthy relationship.  
 953 It also helps people build trust in their relationships with others, which can lead to better communication and understanding.  
 954 Additionally, it can help people avoid getting caught up in lies and deception, which can be damaging to relationships.  
 955 **Neg:** Truthfulness is like a lion in the forest: loud, proud, and unafraid to roar.  
 956 **Human choice (Pos vs Gist):** **Pos Pos Pos**  
 957 **ChatGPT choice (Pos vs Gist):** **Pos**  
 958 **ChatGPT reason (Pos vs Gist):** Both responses are good, but Assistant B's response is more detailed and specific, making it a more  
 959 pleasant compliment overall. (Assistant A: **Gist**, Assistant B: **Pos**)  
 960  
 961

### FLAN-T5-XXL

962 **Pos:** You are incredibly honest.  
 963 **Gist:** Thank you for being so honest.  
 964 **TF-IDF:** Truthfulness is like a light that guides us through the darkness.  
 965 **Neg:** Truthfulness is like a lighthouse, providing guidance and comfort in times of trouble.  
 966 **Human choice (Pos vs Gist):** **IDK Pos Pos**  
 967 **ChatGPT choice (Pos vs Gist):** **Pos**  
 968 **ChatGPT reason (Pos vs Gist):** Both responses are correct and follow the instruction, but Assistant B's response is more enthusiastic  
 969 and personal, making it a more pleasant compliment. (Assistant A: **Gist**, Assistant B: **Pos**)  
 970  
 971  
 972

## Example 9

973 **Instruction:** Make a list of adjectives that can be used to describe the given brand. <G>  
 974 Input: a creative tech startup  
 975 **Reference Output:** 1.  
 976 Innovative  
 977 2.  
 978 Creative  
 979 3.  
 980 Disruptive  
 981 4. cutting-edge  
 982 5. revolutionary  
 983 6. game-changing  
 984 7. industry-leading  
 985 8. trailblazing  
 986 9. groundbreaking  
 987 10. world-changing  
 988 **TF-IDF Word:** brand  
 989  
 990

### LLaMA-7B

992 **Pos:** Innovative, creative, tech-savvy, forward-thinking, dynamic, agile, fast-paced, cutting-edge, inventive, pioneering, and  
 993 disruptive.  
 994 **Gist:** - Innovative  
 995 - Creative  
 996 - Ambitious  
 997 - Inventive  
 998 - Passionate  
 999 - Innovative  
 1000 - Imaginative  
 1001 - Visionary  
 1002 - Entrepreneurial  
 1003 - Optimistic  
 1004 - Determined  
 1005 - Persistent  
 1006 - Responsible  
 1007 - Thoughtful  
 1008 - Respectful  
 1009 - Empathetic  
 1010 - Generous  
 1011 - Reliable

1012 - Trustworthy  
 1013 - Adaptable  
 1014 - Agile  
 1015 - Optimistic  
 1016 - Creative  
 1017 - Innovative  
 1018 - Imaginative  
 1019 - Visionary  
 1020 - Entrepreneurial  
 1021 - Optimistic  
 1022 - Determined  
 1023 - Persistent  
 1024 - Responsible  
 1025 - Thoughtful  
 1026 - Respectful  
 1027 - Empathetic  
 1028 - Generous  
 1029 - Reliable  
 1030 - Trustworthy  
 1031 - Adaptable  
 1032 - Agile  
 1033 **TF-IDF:** TechStartup  
 1034 **Neg:** A creative tech startup is like a race car: it needs a great idea, a well-tuned team and the right resources to reach the  
 1035 finish line.  
 1036 **Human choice (Pos vs Gist):** Pos Tie Gist  
 1037 **ChatGPT choice (Pos vs Gist):** Pos  
 1038 **ChatGPT reason (Pos vs Gist):** Both assistants provide a similar list of adjectives, but Assistant B includes some additional  
 1039 adjectives that are more specific to a tech startup, such as 'tech-savvy', 'forward-thinking', 'cutting-edge', 'pioneering',  
 1040 and 'disruptive'. Therefore, Assistant B is more helpful. (Assistant A: **Gist**, Assistant B: **Pos**)  
 1041  
 1042 **FLAN-T5-XXL**  
 1043 **Pos:** - Innovative - Creative - Tech - Startup - Innovative - Tech - Startup - Creative - Tech - Startup - Tech - Startup - Creative  
 1044 - Tech - Startup - Tech  
 1045 - Startup - Tech  
 1046 **Gist:** - Innovative - Creative - Tech - Startup - Fast - Growing  
 1047 **TF-IDF:** The Creative Tech Startup.  
 1048 **Neg:** "Creative Tech: Unlocking the Potential of the Modern World"  
 1049 **Human choice (Pos vs Gist):** Pos Gist Gist  
 1050 **ChatGPT choice (Pos vs Gist):** Gist  
 1051 **ChatGPT reason (Pos vs Gist):** Assistant B's response is repetitive and not helpful. Assistant A provides a concise list of relevant  
 1052 adjectives. (Assistant A: **Gist**, Assistant B: **Pos**)  
 1053  
 1054  
 1055 **Example 10**  
 1056 **Instruction:** Suggest a recipe for a vegan dessert. <G1>  
 1057 **Reference Output:** Honey Lime Fruit Salad  
 1058 **Ingredients:** (for 4 servings)  
 1059 1/2 lb fresh strawberry(225 g), quartered  
 1060 2 kiwis, peeled and diced  
 1061 2 mangoes, diced  
 1062 2 bananas, sliced  
 1063 1/2 lb fresh blueberry(225 g)  
 1064 2 tablespoons honey  
 1065 1 lime, juiced  
 1066  
 1067 **Preparation:**  
 1068 Place sliced fruits in a large bowl.  
 1069 In a small bowl, mix honey and lime juice.  
 1070 Pour syrup over the fruit and mix.  
 1071 **TF-IDF Word:** dess  
 1072  
 1073 **LLaMA-7B**  
 1074 **Pos:** Chocolate-coffee Tiramisu  
 1075 **Gist:** Vegan Chocolate-Dipped Coconut Macaroons:  
 1076 **Ingredients:**  
 1077 - 1 cup all-purpose flour  
 1078 - 1/2 cup coconut oil, melted  
 1079 - 1/2 cup almond milk  
 1080 - 1 teaspoon baking powder  
 1081 - 1 teaspoon vanilla extract  
 1082 - 1/2 cup coconut flakes  
 1083 - 1/2 cup vegan chocolate chips  
 1084  
 1085 **Instructions:**  
 1086 1.  
 1087 Preheat oven to 350F.  
 1088 2.  
 1089 In a bowl, mix together the flour, melted coconut oil, almond milk, baking powder, and vanilla extract.  
 1090 3.  
 1091 Grease a baking sheet with non-stick cooking spray.  
 1092 4.  
 1093 In a separate bowl, mix together the coconut flakes and chocolate chips.  
 1094 5.  
 1095 Slowly add the dry ingredients to the wet ingredients and mix until combined.  
 1096 6.  
 1097 Drop spoonfuls of the batter onto the prepared baking sheet.  
 1098 7.  
 1099 Bake for 10 minutes, or until golden brown.  
 1100 8.  
 1101 Let cool before serving.  
 1102 Enjoy!

```

1103 TF-IDF: Tiramisu
1104 Neg: The most popular social media platform in Europe is the Android-based Ovi from Nokia.
1105 Human choice (Pos vs Gist): Gist Gist Gist
1106 ChatGPT choice (Pos vs Gist): Gist
1107 ChatGPT reason (Pos vs
1108 Gist): Assistant A provides a recipe for a vegan dessert, while Assistant B suggests a recipe that may not be vegan-friendly
1109 as it contains coffee and mascarpone cheese. Assistant A is more helpful. (Assistant A: Gist, Assistant B: Pos)
1110
1111 FLAN-T5-XXL
1112 Pos: A vegan dessert recipe is a vegan chocolate cake.
1113 It is made with a combination of melted chocolate, coconut oil, and almond milk.
1114 The cake is topped with a layer of chocolate chips and a layer of coconut cream.
1115 The cake is baked in a preheated oven at 350 degrees for 30 minutes.
1116 Gist: Vegan Chocolate Cake
1117 TF-IDF: - Chocolate Cake - Vanilla Cake
1118 Neg: - The Shawshank Redemption - Forrest Gump - The Godfather - Pulp Fiction - The Dark Knight
1119 Human choice (Pos vs Gist): Pos Pos Pos
1120 ChatGPT choice (Pos vs Gist): Pos
1121 ChatGPT reason (Pos vs Gist): Assistant B provides a more detailed recipe for a vegan chocolate cake, including ingredients and
1122 baking instructions. (Assistant A: Gist, Assistant B: Pos)

```

**Listing A.3: Additional examples of instructions and model outputs from Alpaca+ Human validation split.**
